# Supplementary material for: Molecular Evolution of the Two-Component System BvgAS Involved in Virulence Regulation in Bordetella
Source: PubMed Central journal article supplement (PMC2737282; doi:10.1371/journal.pone.0006996), 2009-09-14
Supplement: pone.0006996.s001.pdf [file pone.0006996.s001.pdf]

| Oligonucleotides                                                           | Sequences                                                                                                                                 | Amplicons and comments                                                                                                                                                                           |
|----------------------------------------------------------------------------|-------------------------------------------------------------------------------------------------------------------------------------------|--------------------------------------------------------------------------------------------------------------------------------------------------------------------------------------------------|
| bvgS-Up<br>bvgS-Lo                                                         | 5'-TTCTAGACATTGCGAAGATCG-3'<br>5'-ATAAGCTTCATGGTCAGCCTCAGGTCC-3'                                                                          | 526 bp <i>XbaI-HindIII</i> <i>bvgS</i> fragment for construction of BPSM <sub>Δ<i>bvgAS</i></sub> and allelic exchange                                                                           |
| bvgA-Up<br>bvgA''-Lo                                                       | 5'-TAGAATTCAACGGCATTGACGGGCTCA-3'<br>5'-TAGGTACCCTAGTTGGACAACACGCTGATGA-3'                                                                | 504 bp <i>EcoRI-KpnI</i> <i>bvgA</i> fragment for construction of BPSM <sub>Δ<i>bvgAS</i></sub>                                                                                                  |
| bvgA-Lo                                                                    | 5'-ATACTAGTGACGTGGCGTTCAGCTTCTG-3'                                                                                                        | 504 bp <i>EcoRI-SpeI</i> <i>bvgA</i> fragment for allelic exchange (used with bvgA-Up)                                                                                                           |
| bvgA'-Up<br>bvgA'-Lo                                                       | 5'-AGCCATTCCTTTGACGCATCA-3'<br>5'-CAGATCAGACTGCGGGGGTAC-3'                                                                                | 762 bp fragment coding for BvgA (sequencing)                                                                                                                                                     |
| VFT1-Up<br>VFT1-Lo                                                         | 5'-ATACTAGTGGAAGCTGATAGACCTCGCCAA-3'<br>5'-TAGGATCCCAGTCCCCAGCGGTAGATCA-3'                                                                | 904 bp <i>SpeI-BamHI</i> fragment coding for VFT1 (cassette exchange)                                                                                                                            |
| VFT1'-Up<br>VFT1'-Lo                                                       | 5'-GCAGAAGCTGAACGCCACGTC-3'<br>5'-ATTCAGGACCGCCACCTTGAC-3'                                                                                | 1020 bp fragment coding for VFT1 (sequencing)                                                                                                                                                    |
| VFT2-Up<br>VFT2-Lo                                                         | 5'-TAGGATCCAGCATTTCGCTCGATTTCG-3'<br>5'-GGTAGATCTCGTTGCGGTAGG-3'                                                                          | 786 bp <i>BamHI-BglII</i> fragment coding for VFT2 (cassette exchange)                                                                                                                           |
| VFT2'-Up<br>VFT2'-Lo                                                       | 5'-GCCTGCTGCGGGTGGTCA-3'<br>5'-TCGATGAGCACGCGCATGAAT-3'                                                                                   | 1000 bp fragment coding for VFT2 (sequencing)                                                                                                                                                    |
| PAS/HisKin-Up<br>Δ <i>EcoRI</i> -Lo<br>Δ <i>EcoRI</i> -Up<br>PAS/HisKin-Lo | 5'-ACCGCAACGAGATCTACCTG-3'<br>5'-AAATTCCAGCTGGTCGTTC-3'<br>5'-GAACGACCAGCTGGAATTTATGCGCGTGCTCATCGACGG-3'<br>5'-TATCTAGAATGTCGCCTATCAGC-3' | 708 bp <i>BglII-XbaI</i> fragment coding for the PAS and Histidine Kinase domains (overlapping PCR to remove <i>EcoRI</i> site from the cassette). PAS/HisKin-Up and Lo also used for sequencing |
| R-Up<br>R-Lo                                                               | 5'-CCGGGCCAAGACCACGTTTCCT-3'<br>5'-TGCACCGCGTACGTCCGTAAC-3'                                                                               | 1007 bp fragment coding for receiver domain of BvgS (sequencing)                                                                                                                                 |
| Hpt-Up<br>Hpt-Lo                                                           | 5'-ACTACCTGGGCCAGCGTGTC-3'<br>5'-CGGTATCTGCTGGGCGACCAT-3'                                                                                 | 879 bp fragment coding for Hpt domain of BvgS (sequencing)                                                                                                                                       |
